# Supplementary material for: Deletions on Chromosome Y and Downregulation of the SRY Gene in Tumor Tissue Are Associated with Worse Survival of Glioblastoma Patients
Source: MDPI journal article supplement (doi:10.3390/cancers13071619), 2021-03-31
Supplement: s1 [file s1]

**Supplementary Table S1.** Clinicopathological data of male GBM patients from TCGA.

|                |                                                              | Number of patients | Percentage |
|----------------|--------------------------------------------------------------|--------------------|------------|
| Age, years     | ≤60                                                          | 107                | 48%        |
|                | >60                                                          | 118                | 52%        |
| Treatment type | Alkylating/ TMZ chemo                                        | 6                  | 2.7%       |
|                | TMZ chemoradiation + TMZ chemo                               | 91                 | 41.6%      |
|                | Standard radiation + alkylating/ TMZ chemo                   | 52                 | 23.7%      |
|                | Standard radiation                                           | 17                 | 7.8%       |
|                | Nonstandard/ unspecified radiation                           | 32                 | 14.6%      |
|                | Nonstandard/ unspecified radiation + chemo (alkylating/ TMZ) | 14                 | 6.4%       |
|                | Unspecified therapy                                          | 7                  | 3.2%       |

**Supplementary Table S2.** Probes used in the ddPCR for estimation of CN of the genes on chromosome Y.

| Name of the gene | Location on chromosome Y | Name of the assay | Length [nucleotides] | Provider           | Reference gene | Annealing temperature [°C] |
|------------------|--------------------------|-------------------|----------------------|--------------------|----------------|----------------------------|
| SRY              | 2,786,855-2,787,699      | dHsaCP250 0472    | 69                   | BioRad             | AP3B1          | 60                         |
| ZFY              | 2,935,281-2,982,506      | Hs0570806 6_cn    | 89                   | Applied Biosystems | AP3B1          | 60                         |
| AMELY            | 6,865,918-6,911,774      | dHsaCNS6 70716622 | 77                   | BioRad             | AP3B1          | 57                         |
| ARSEP1           | 12,339,813-12,347,495    | dHsaCNS6 83350032 | 80                   | BioRad             | AP3B1          | 57                         |
| USP9Y            | 12,537,650-12,860,839    | dHsaCP250 6328    | 69                   | BioRad             | AP3B1          | 60                         |
| UTY              | 13,248,379-13,480,673    | Hs0126180 _cn     | 84                   | Applied Biosystems | AP3B1          | 55                         |
| TMSB4Y           | 13,703,899-13,706,024    | dHsaCNS1 86618179 | 65                   | BioRad             | AP3B1          | 57                         |
| NLGN4Y           | 14,522,573-14,845,650    | Hs0570479 8_cn    | 85                   | Applied Biosystems | AP3B1          | 60                         |
| KDM5D            | 19,703,865-19,744,939    | Hs0255539 2_cn    | 72                   | Applied Biosystems | AP3B1          | 55                         |
| EIF1AY           | 20,575,776-20,593,154    | Hs0107914 3_cn    | 77                   | Applied Biosystems | AP3B1          | 55                         |

a

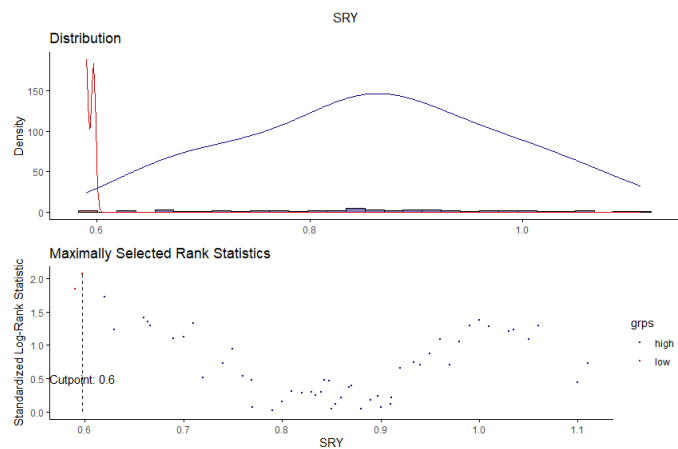

b

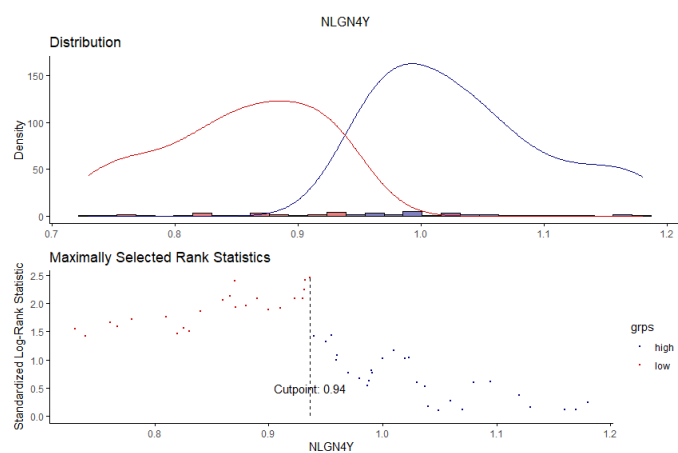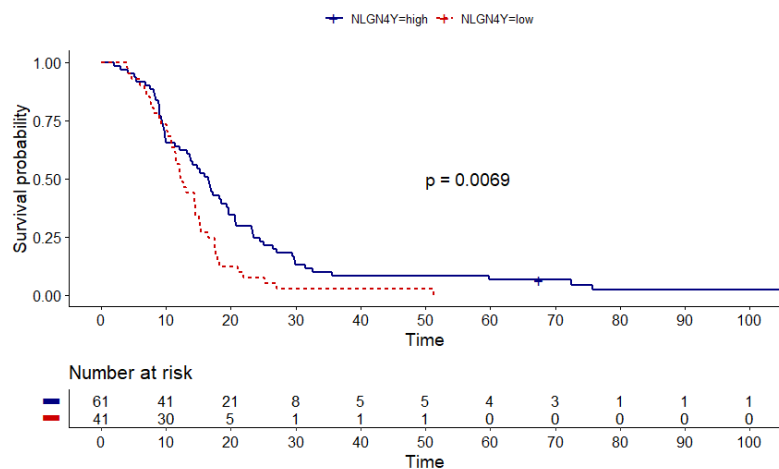

c

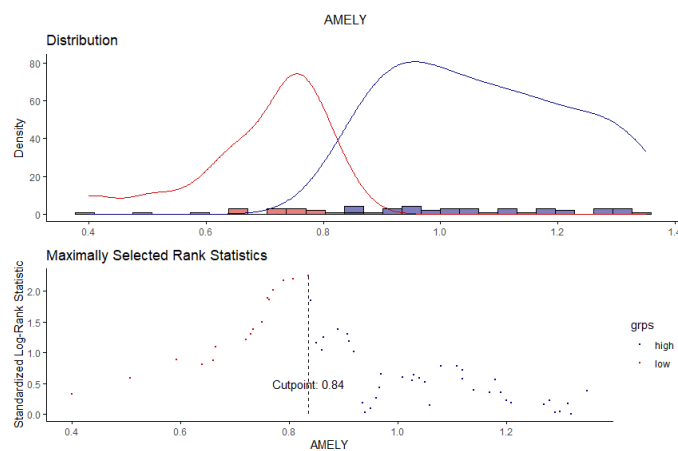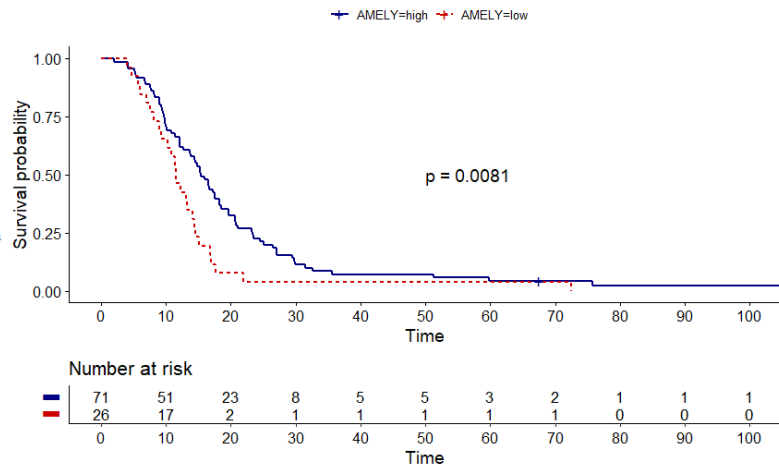

d

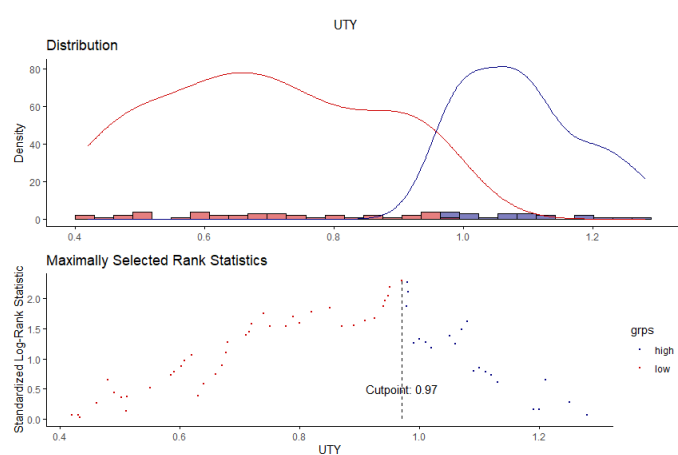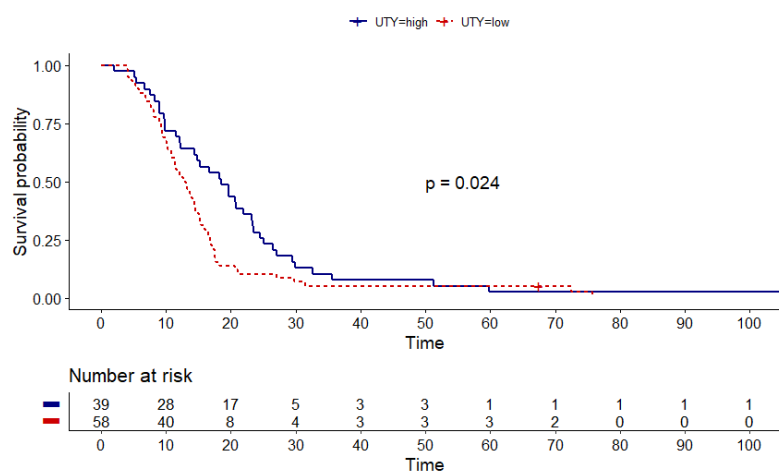

e

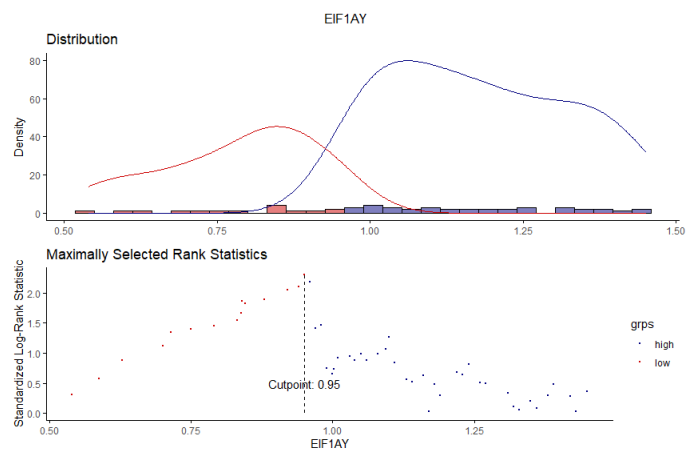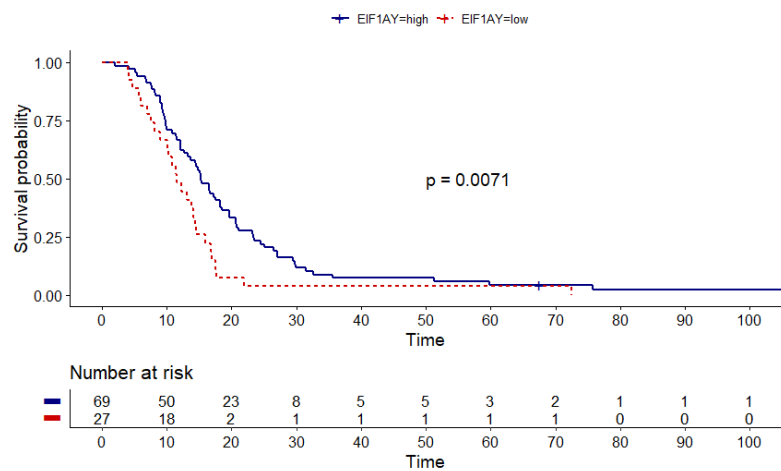

f

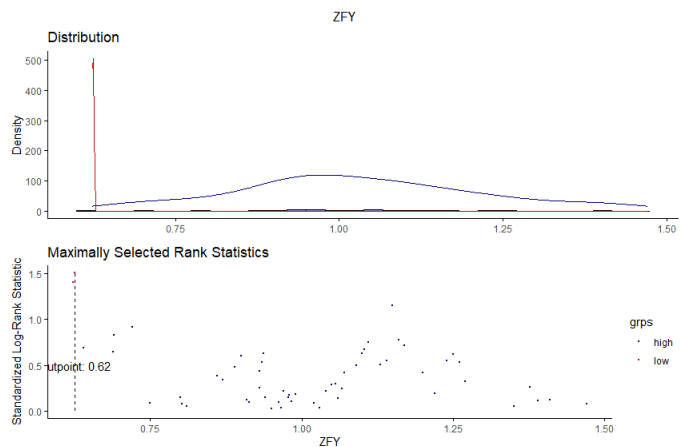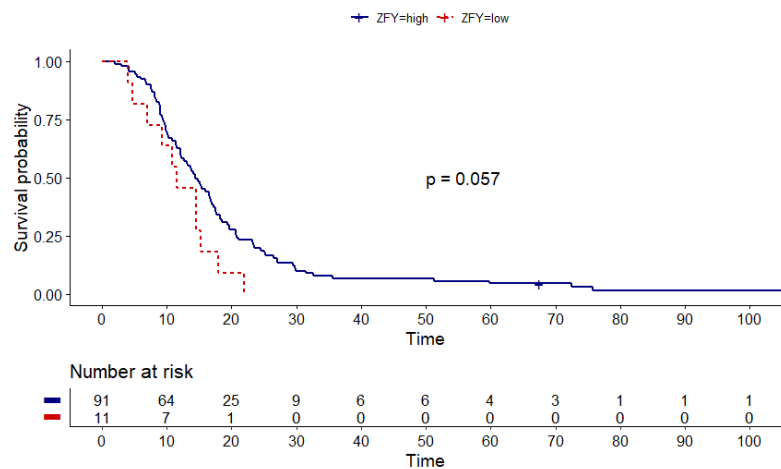

g

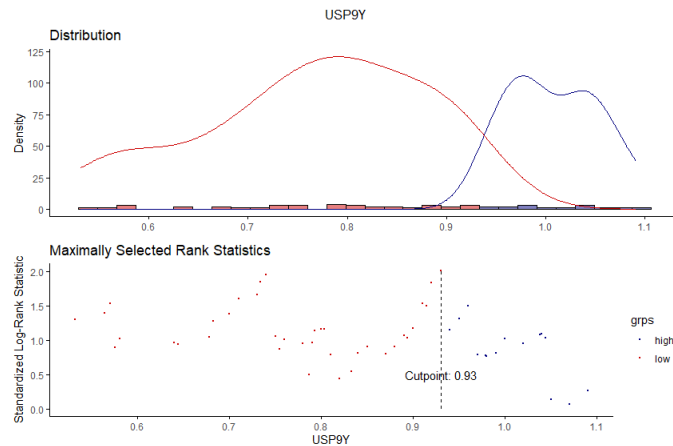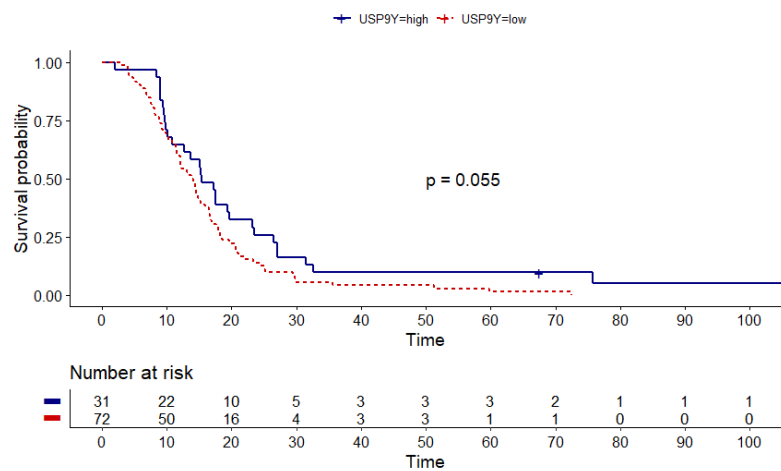

h

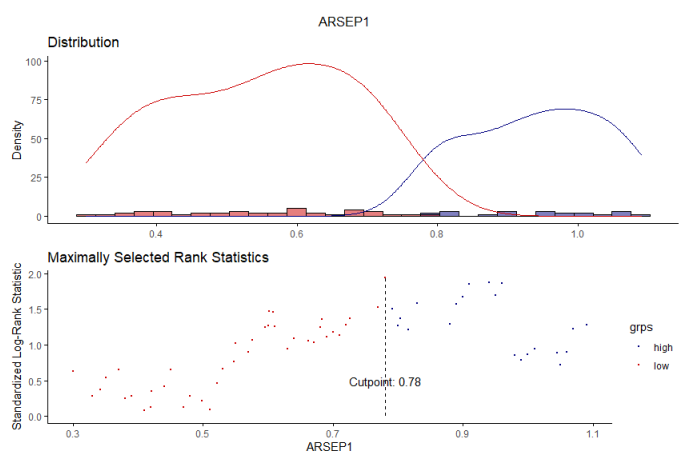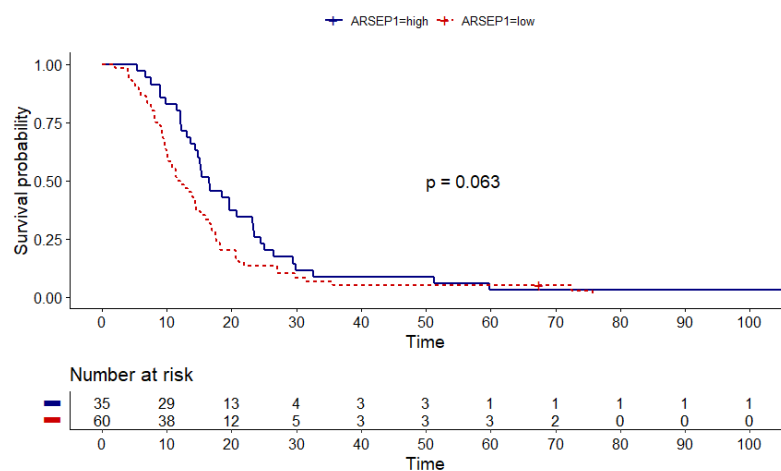

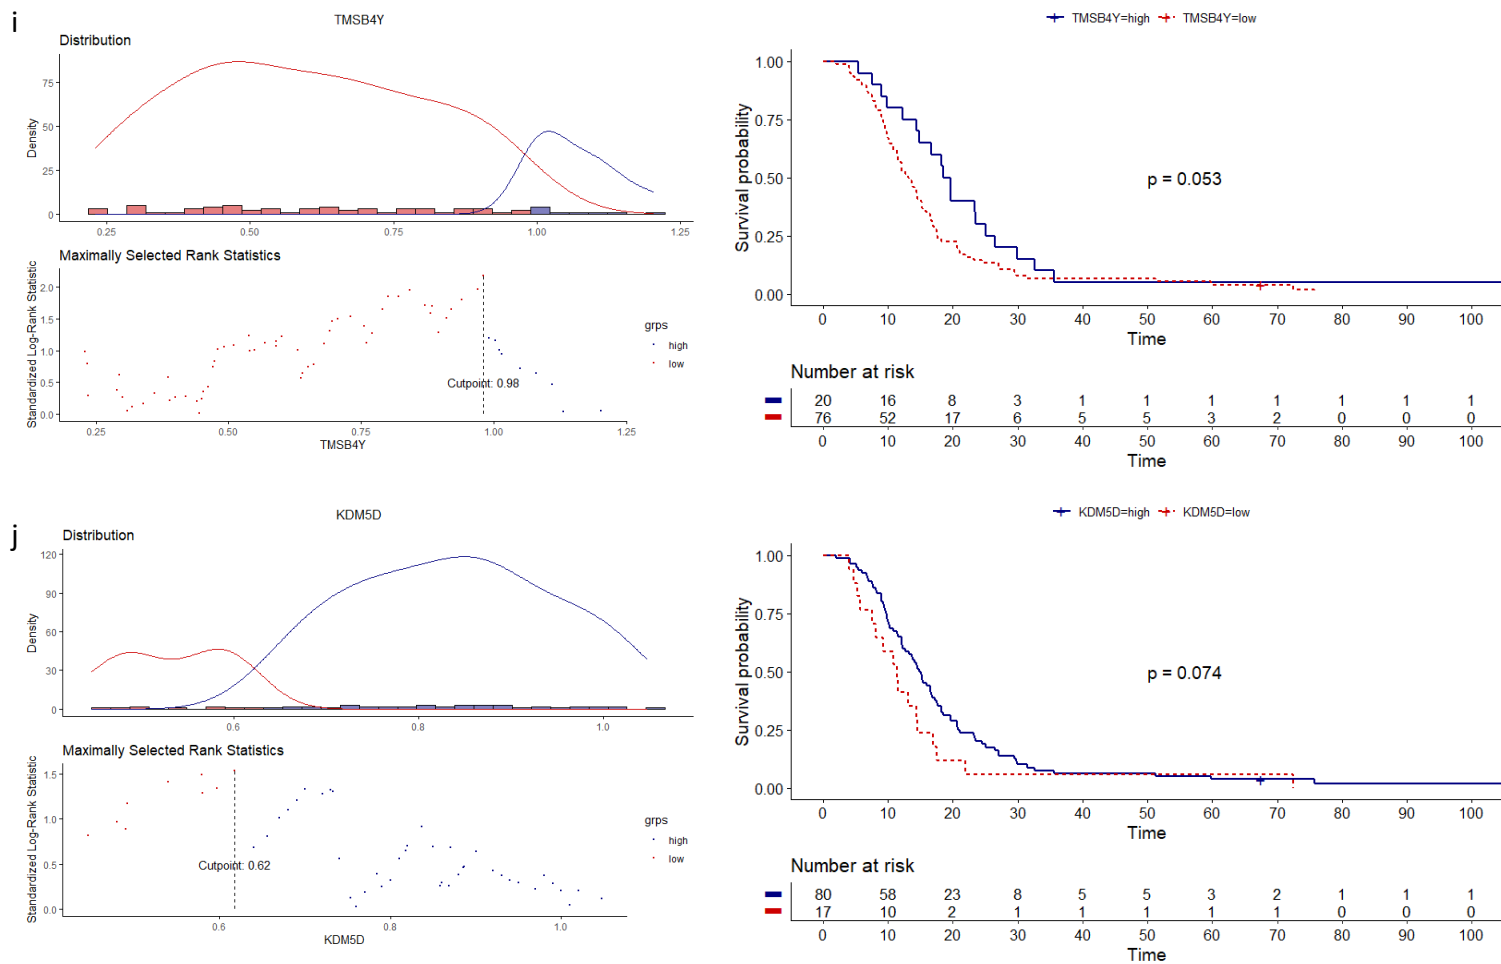

**Supplementary Figure S1.** Results of the survival analysis based on the CN values with Kaplan-Meier log rank method after cut-off determination via maximally selected rank statistics ( $p < 0.05$ ). On the left, graphs for selection of the best cut-off point, on the right, survival curves ((a) *SRY*; (b) *NLGN4Y*; (c) *AMELY*; (d) *UTY*; (e) *EIF1AY*; (f) *ZFY*; (g) *USP9Y*; (h) *ARSEPI1*; (i) *TMSB4Y*; (j) *KDM5D*).

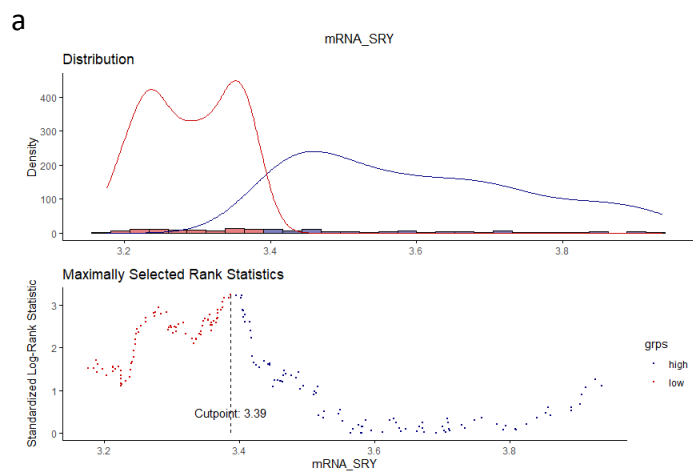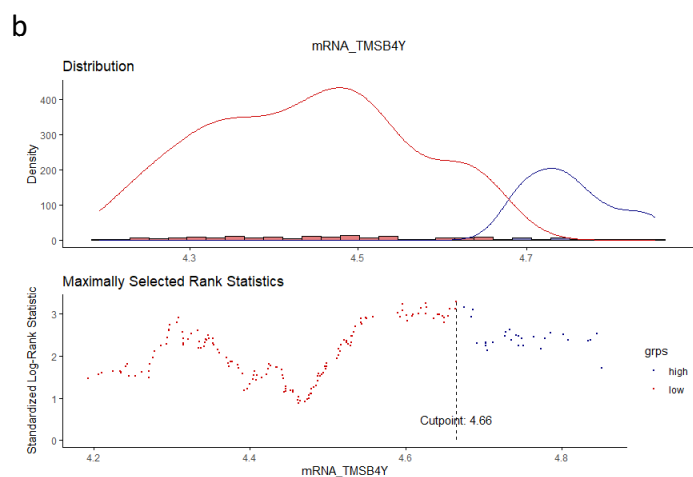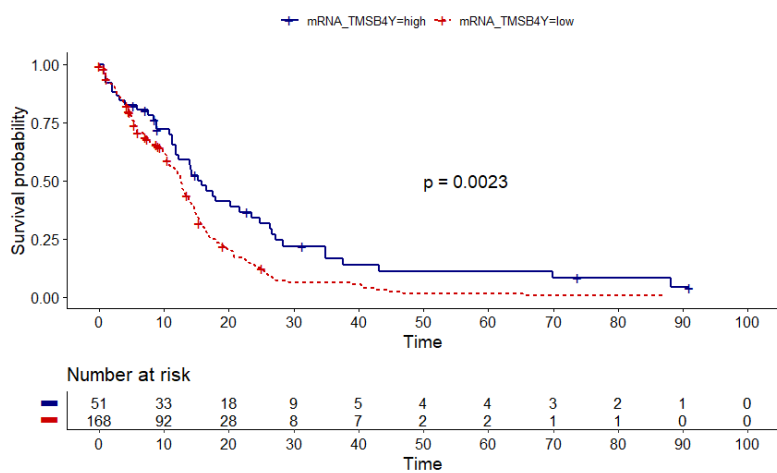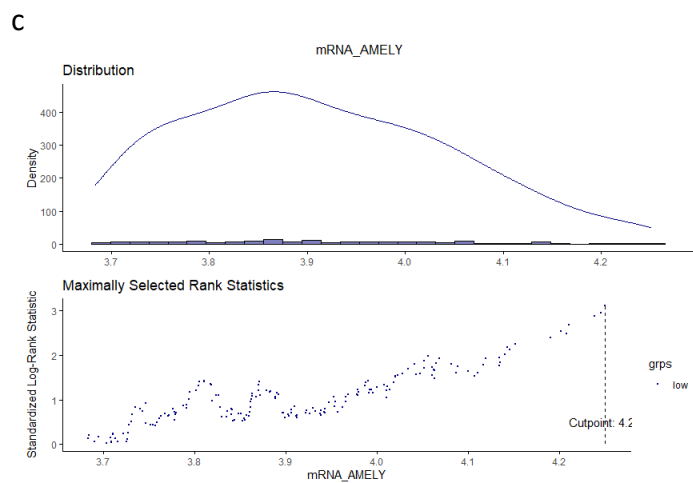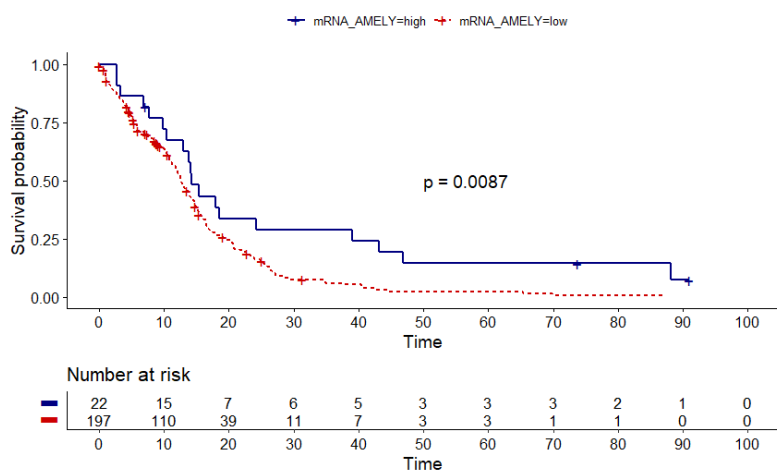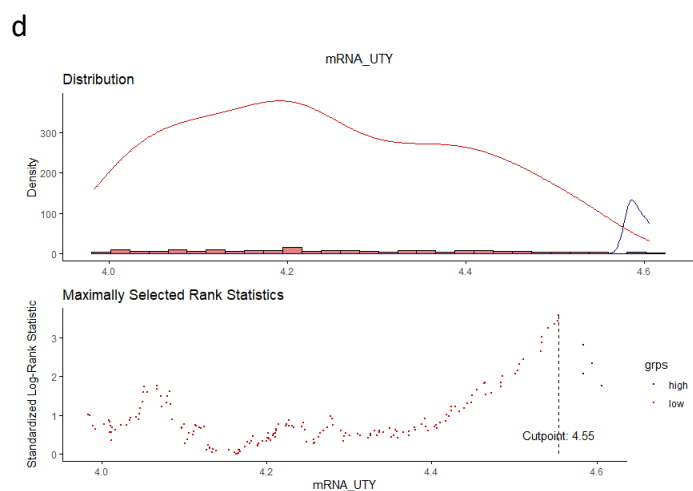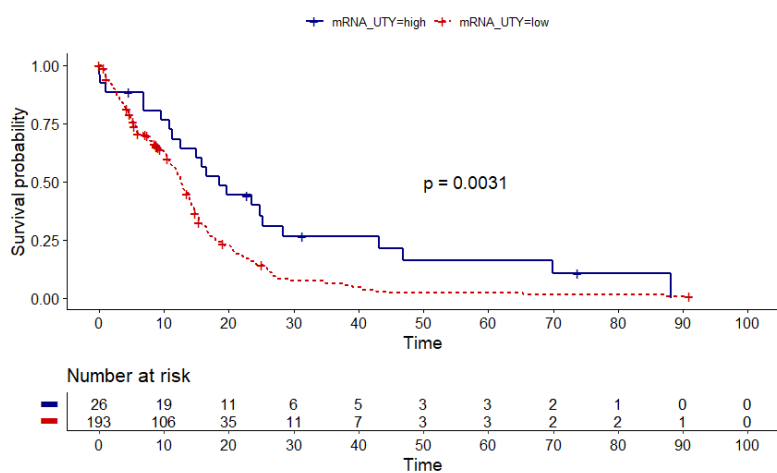

e

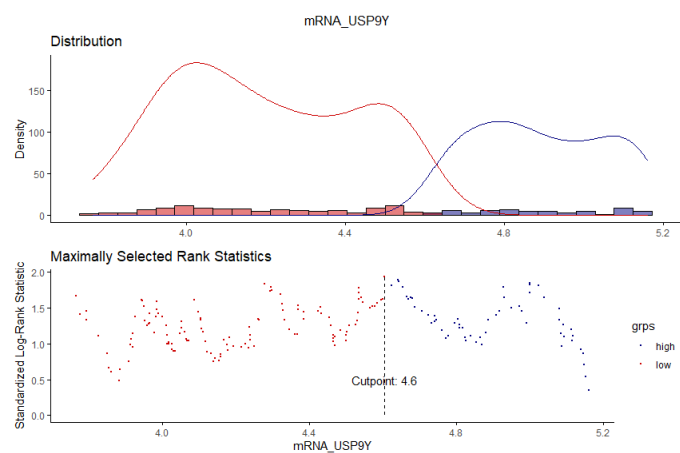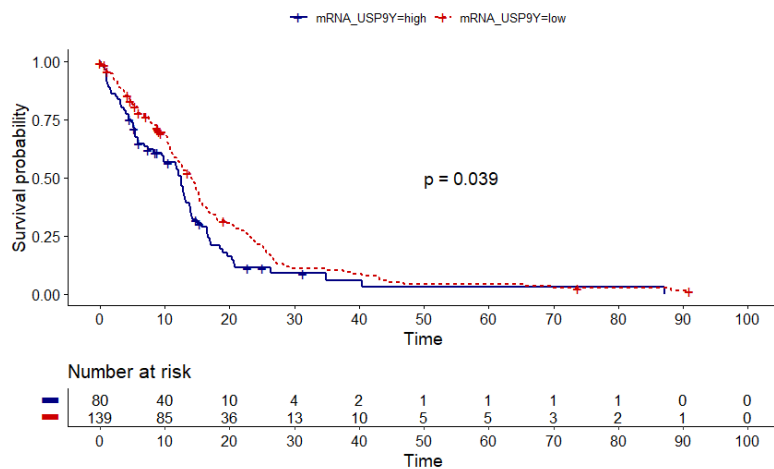

f

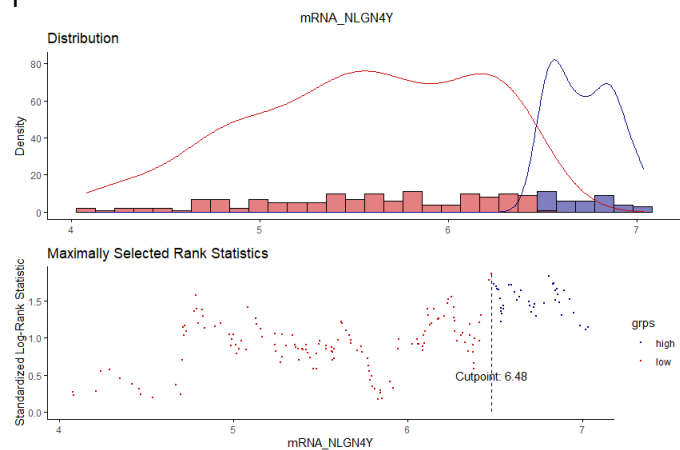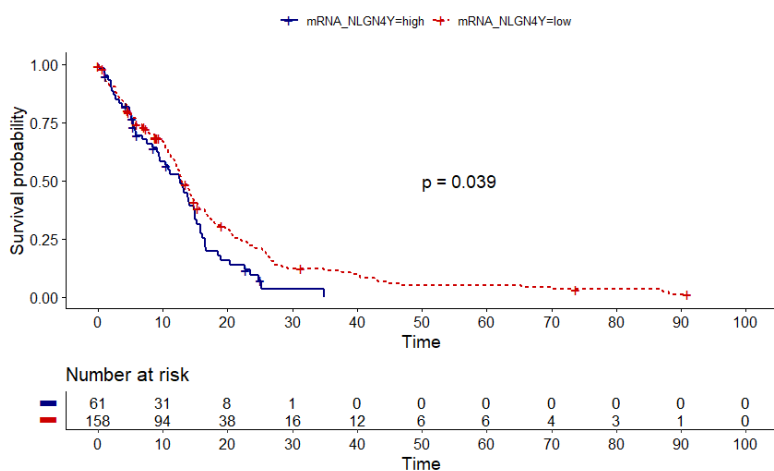

g

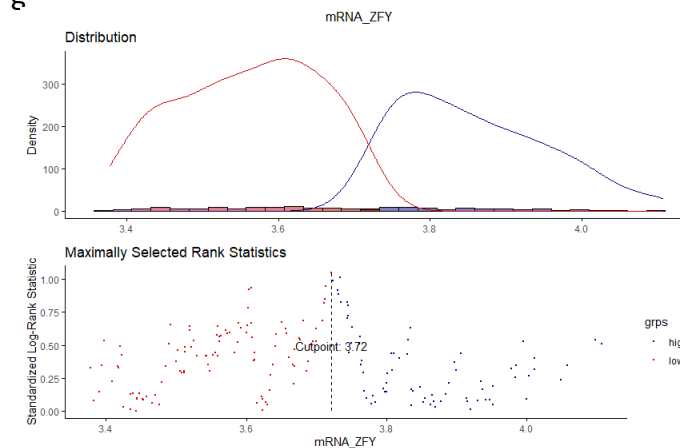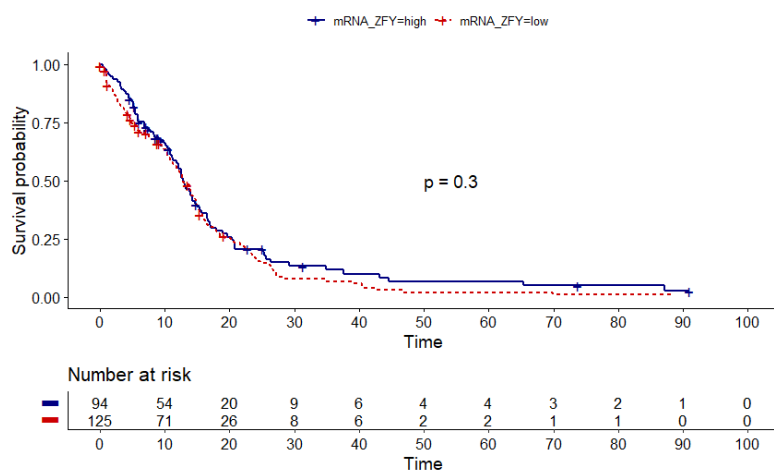

h

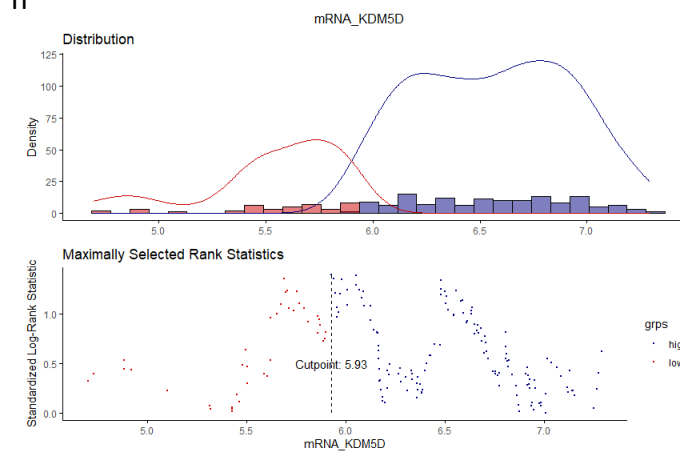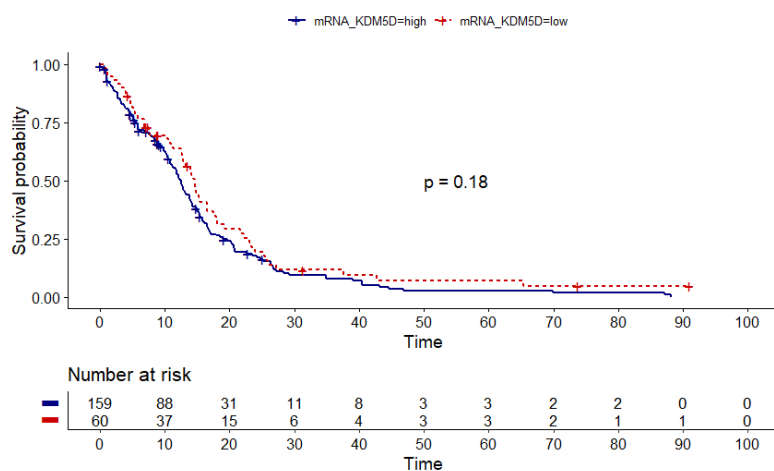

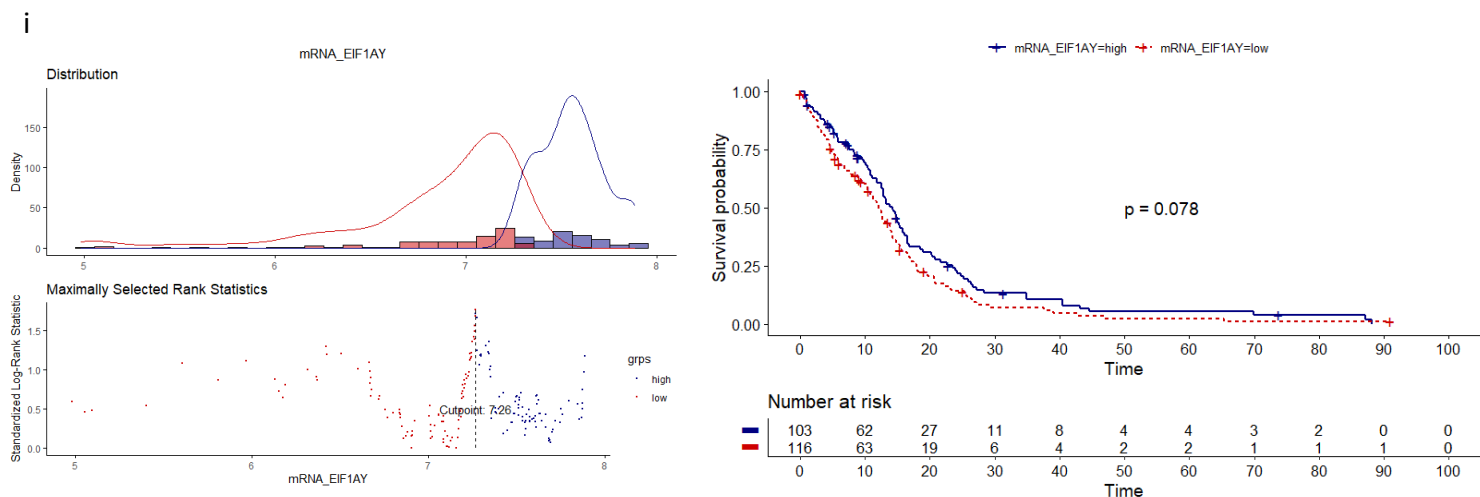

**Supplementary Figure S2.** Comparison of relative *SRY* expression between males with GBM and LGG from TCGA. LGG have very low *SRY* expression, nearly undetectable, whereas GBM can be characterized as high *SRY*-expressing tumor. The difference was tested with the non-parametric Mann-Whitney U test and is statistically significant ( $p=1.6 \times 10^{-41}$ ).

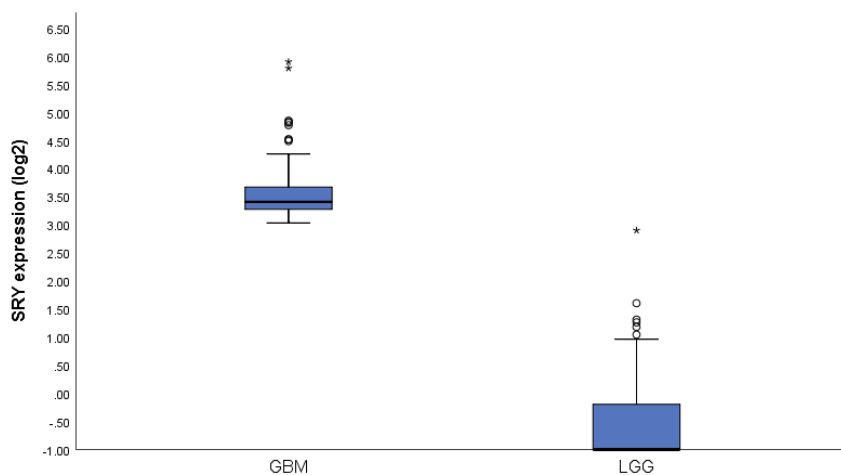

**Supplementary Figure S3.** Results of the survival analysis based on the mRNA gene expression from TCGA with Kaplan-Meier log rank method after cut-off determination via maximally selected rank statistic. On the left, graphs for selection of the best cut-off point, on the right, Kaplan-Meier survival curves. (a) cut-off determination for the most significant gene *SRY*; (b-f) genes with significant influence on the OS of GBM male patients; (e, f) statistically significant results where lower expression of genes correlated with shorter OS; (g-i) genes without significant influence on the OS.
